# Supplementary material for: Hydration of ions and salt crystallization in liquid phase coexistent with ice at temperature below eutectic point
Source: Royal Society of Chemistry journal article supplement (doi:10.1039/c1ra00801c), 2011-11-08
Supplement: c1ra00801c.pdf [file c1ra00801c.pdf]

### Supporting Information

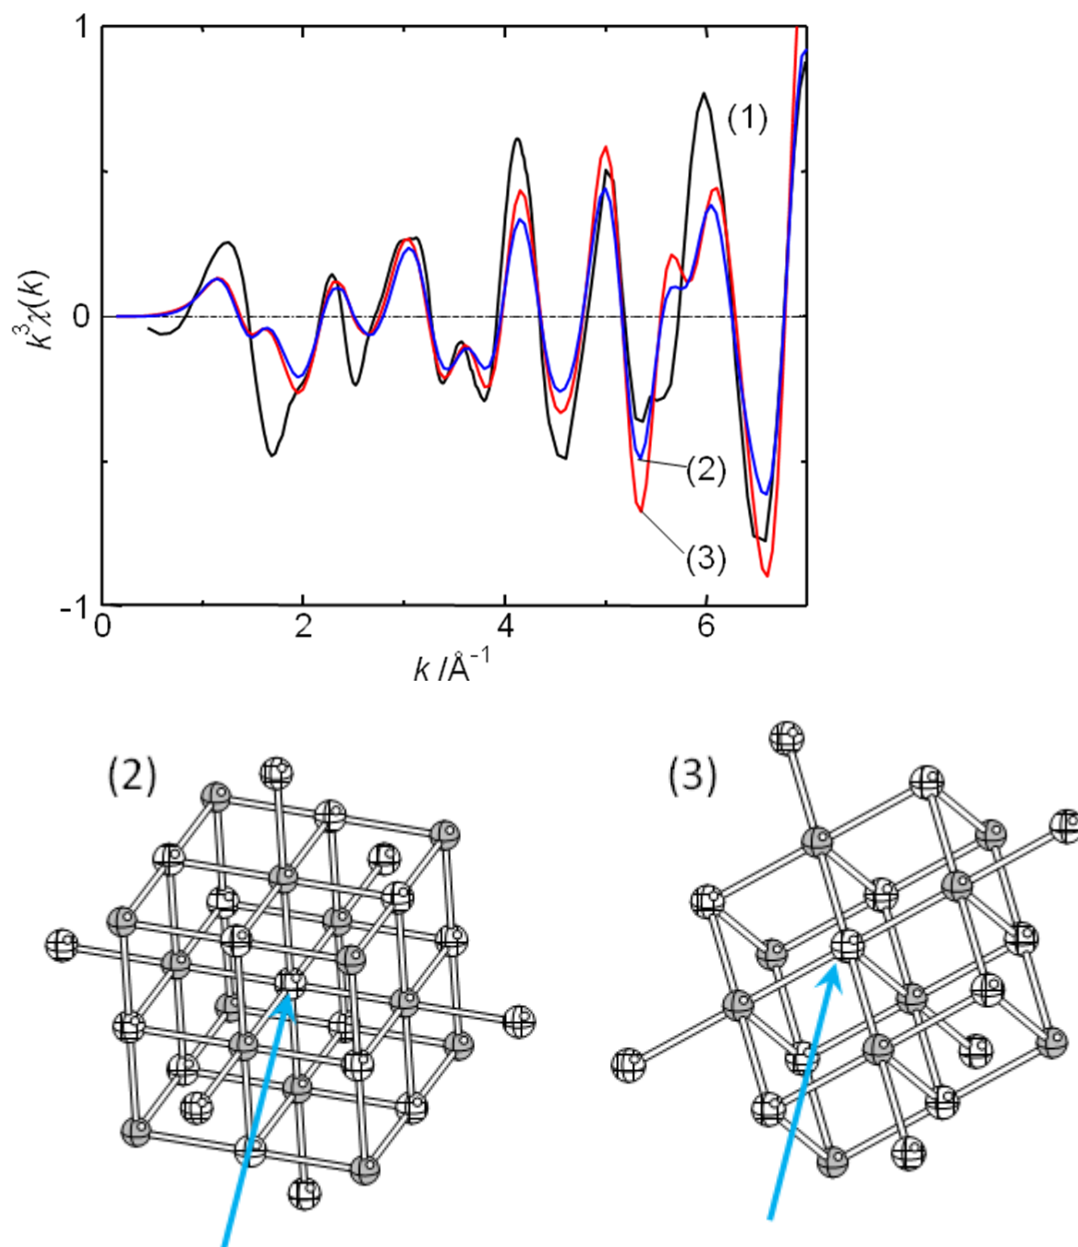

Figure S1 XAFS spectrum of RbBr crystal powder (1) and simulated spectra for Br<sup>-</sup> in the anhydrous RbBr crystal; (2) Br<sup>-</sup> on the surface of the crystal and (3) in the interior of the crystal. Models for (2) and (3) are also depicted with blue arrows indicating absorbing atoms.

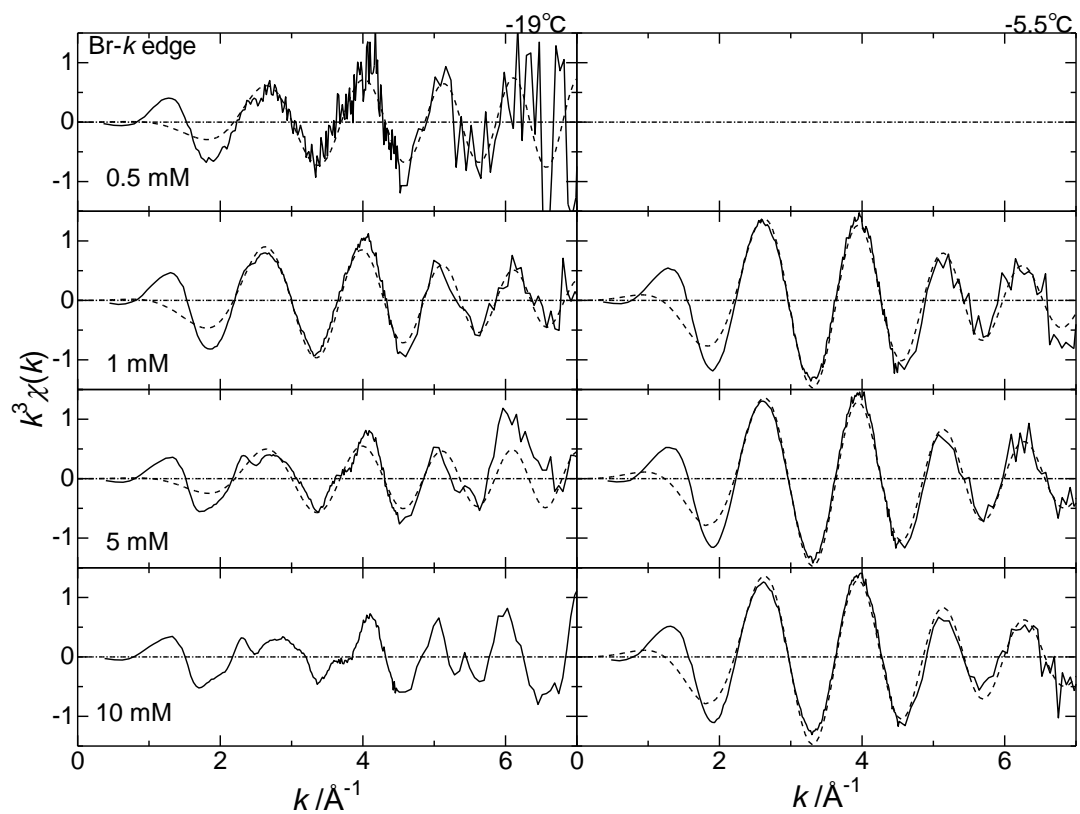

Figure S2 XAFS spectra at the Br-K edge and results of usual curve-fitting with the XAFS parameters using Br-O as the model

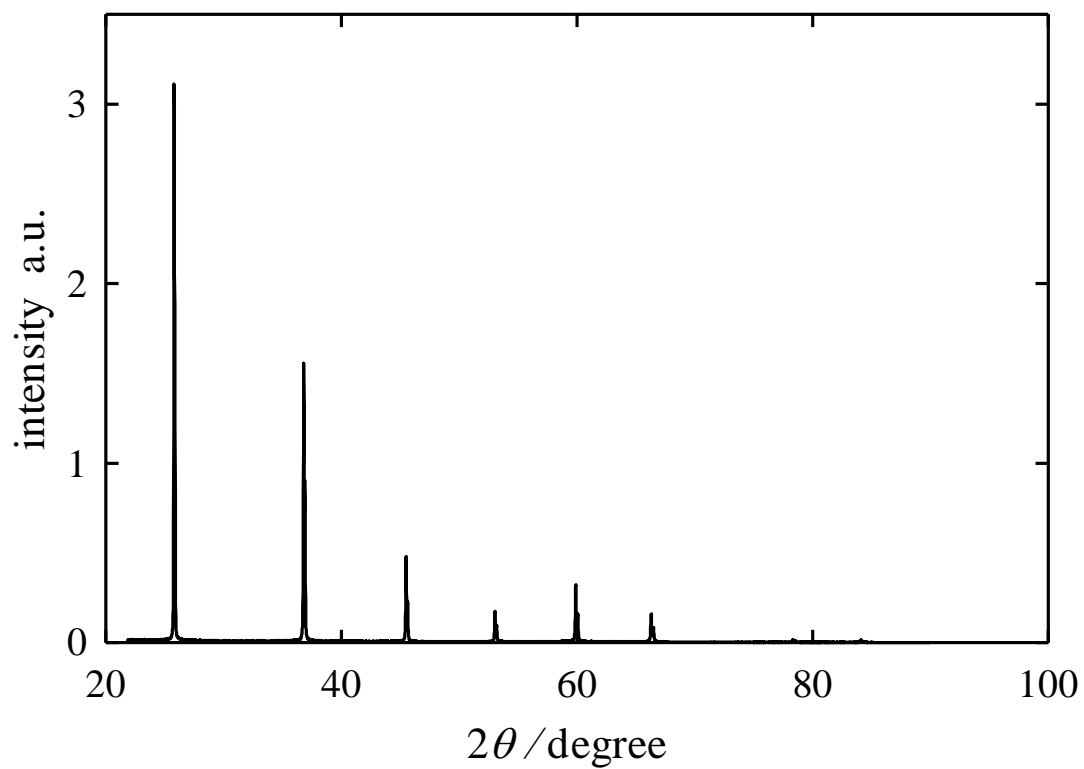

Figure S3 X-ray diffraction from authentic anhydrous RbBr crystal
